# Supplementary material
Source: PubMed Central journal article supplement (PMC1366640)

Figure 1S Radial distribution functions ( $g(R)$ ) and running coordination numbers ( $K(R)$ ) of waters around phosphates of the recognition sequence of specific (bold line) and non-cognate (thin line) substrates in complex with BamHI.

P2

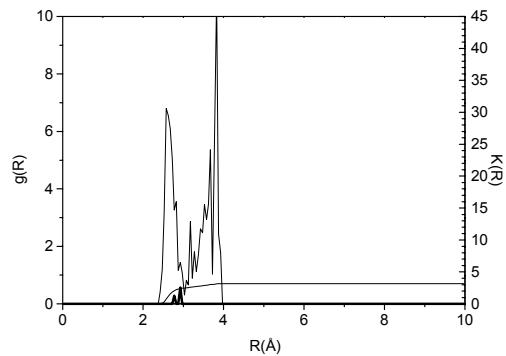

P3

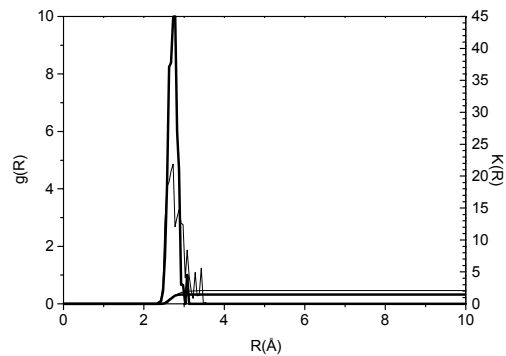

P4

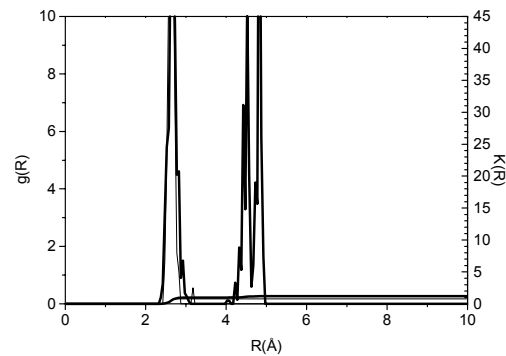

P15

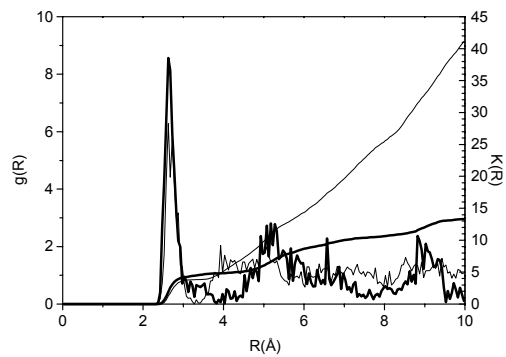

P14

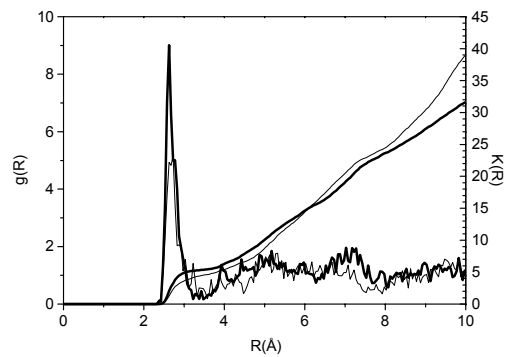

P13

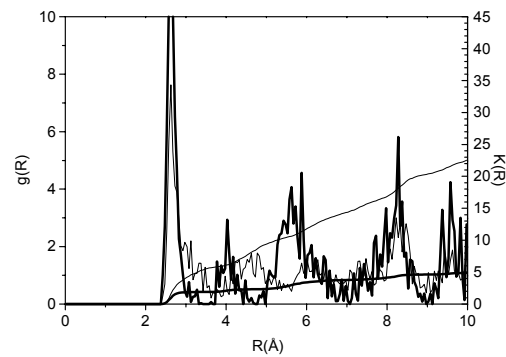

P5

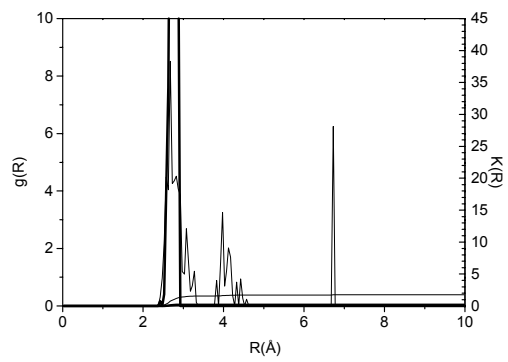

P6

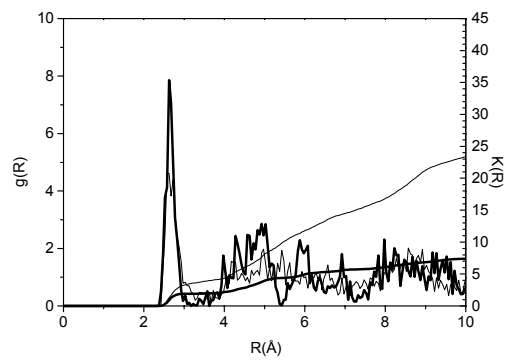

P7

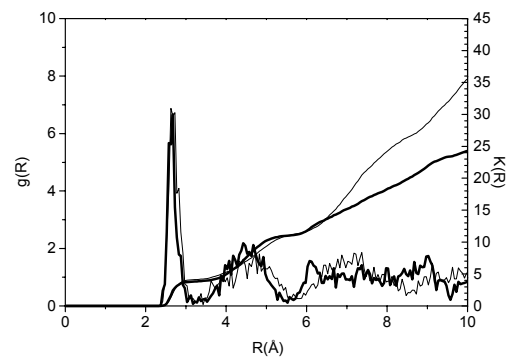

P12

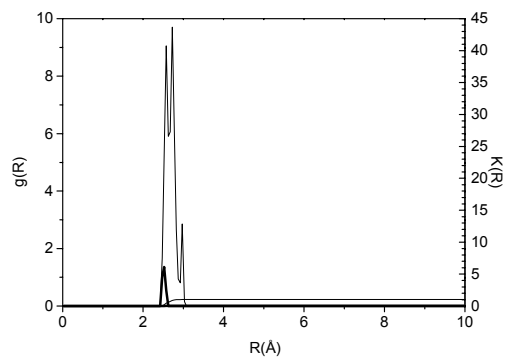

P11

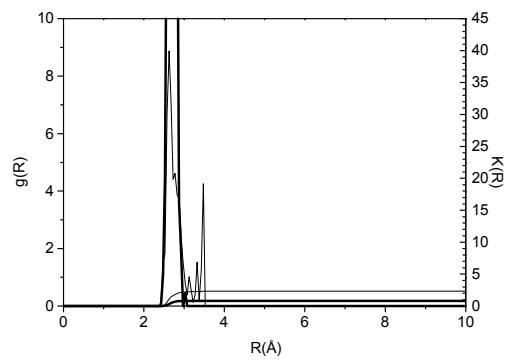

P10

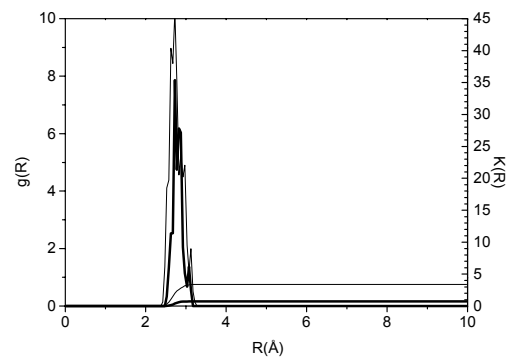

Supplement: biophysj_105.063263_1.pdf [file biophysj_105.063263_1.pdf]
