# Supplementary material
Source: PubMed Central journal article supplement (PMC1366640)
Supplement: biophysj_105.063263_2.pdf [file biophysj_105.063263_2.pdf]

**Table 1S.** Number of water molecules in the minor groove, major groove and phosphates along the DNA basepairs of the cognate (**BHM\_GS**) and non-cognate (**ESG\_GS**) complex in the first two solvation shells (up to 5.5 Å).

|                             | Major groove |        | Minor groove |        | Phosphate strand 1 |        | Phosphate strand 2 |        | Total  |        |
|-----------------------------|--------------|--------|--------------|--------|--------------------|--------|--------------------|--------|--------|--------|
|                             | BHM_GS       | ESG_GS | BHM_GS       | ESG_GS | BHM_GS             | ESG_GS | BHM_GS             | ESG_GS | Σ(BHM) | Σ(ESG) |
| <b>GC2<br/>(P2,P15)</b>     | 2.5          | 11.8   | 7.8          | 11.5   | 0.0                | 3.1    | 7.6                | 12.4   | 17.9   | 38.8   |
| <b>GC3<br/>(P3,P14)</b>     | 2.9          | 7.3    | 7.4          | 8.2    | 1.5                | 2.1    | 12.4               | 11.5   | 24.2   | 29.1   |
| <b>AT4<br/>(P4,P13)</b>     | 2.0          | 8.2    | 1.0          | 10.5   | 1.2                | 0.8    | 2.8                | 10.4   | 7.0    | 29.9   |
| <b>TA5<br/>(P5,P12)</b>     | 0.1          | 7.3    | 2.3          | 13.6   | 0.2                | 1.7    | 0.0                | 1.1    | 2.6    | 23.7   |
| <b>CG6,TA6<br/>(P6,P11)</b> | 4.6          | 6.0    | 8.6          | 10.0   | 4.4                | 10.1   | 0.8                | 2.3    | 18.4   | 28.4   |
| <b>CG7<br/>(P7,P10)</b>     | 2.2          | 8.7    | 3.7          | 12.0   | 11.0               | 11.0   | 0.7                | 3.4    | 17.6   | 35.1   |
| <b>Σ</b>                    | 14.3         | 49.3   | 30.8         | 65.8   | 18.3               | 28.8   | 24.3               | 41.1   | 87.7   | 185.0  |
